# Supplementary material
Source: HighWire-hosted journal article supplement (https://bmjophth.bmj.com/content/8/1/e001253)
Supplement: inline-supplementary-material-1 [file inline-supplementary-material-1.pdf]

| Supplementary Table 1: Average Days Females Wait Longer Than Males Stratified by Priority Level |                |         |          |        |          |              |               |            |
|-------------------------------------------------------------------------------------------------|----------------|---------|----------|--------|----------|--------------|---------------|------------|
| Year                                                                                            | Priority Level | Overall | Cataract | Cornea | Glaucoma | Oculoplastic | Vitreoretinal | Strabismus |
| 2010                                                                                            | High           | 2.30    | -0.93    | -11.89 | 0.48     | 0.29         | -0.05         | NA         |
|                                                                                                 | Medium         | 1.87    | 0.67     | -26.50 | -2.34    | 1.87         | 2.57          | 18.26      |
|                                                                                                 | Low            | 2.19    | 1.28     | 9.72   | -6.81    | 5.96         | 4.29          | -1.37      |
| 2011                                                                                            | High           | 4.57    | -1.20    | 36.73  | 2.89     | 0.95         | -0.01         | NA         |
|                                                                                                 | Medium         | 2.42    | 1.56     | -5.73  | 2.03     | 5.34         | 0.83          | -0.05      |
|                                                                                                 | Low            | 1.05    | 1.83     | -3.89  | -5.89    | 3.63         | 0.62          | 0.77       |
| 2012                                                                                            | High           | 6.53    | 3.59     | 16.07  | 0.07     | -0.08        | -0.19         | NA         |
|                                                                                                 | Medium         | 2.78    | 0.45     | 10.88  | 0.04     | 3.09         | 5.88          | 3.09       |
|                                                                                                 | Low            | 1.96    | 2.35     | 19.21  | -2.12    | 3.67         | -0.19         | 9.56       |
| 2013                                                                                            | High           | 1.39    | -3.77    | -5.64  | -1.79    | -1.68        | -0.08         | 13.09      |
|                                                                                                 | Medium         | 3.82    | 2.63     | 14.60  | 2.39     | -1.69        | 0.97          | -2.43      |
|                                                                                                 | Low            | 2.48    | 2.61     | 9.56   | -1.57    | 7.08         | 1.23          | 9.12       |
| 2014                                                                                            | High           | 6.04    | 2.92     | 6.61   | 2.47     | 15.14        | -0.33         | NA         |
|                                                                                                 | Medium         | 4.92    | 5.28     | 8.51   | -1.45    | 6.44         | -1.44         | -6.23      |
|                                                                                                 | Low            | 2.86    | 3.15     | -4.50  | 0.59     | 7.63         | 4.63          | -2.43      |
| 2015                                                                                            | High           | 5.74    | 7.96     | 0.74   | -1.84    | -1.80        | 4.79          | NA         |
|                                                                                                 | Medium         | 5.79    | 5.24     | 4.45   | 1.31     | -3.38        | -0.33         | -1.31      |
|                                                                                                 | Low            | 3.63    | 2.49     | 8.97   | -0.69    | 5.23         | 4.09          | 0.59       |
| 2016                                                                                            | High           | 2.53    | -0.82    | -4.21  | -7.07    | -2.05        | 1.44          | NA         |
|                                                                                                 | Medium         | 7.96    | 2.78     | -3.84  | 2.78     | 12.83        | 4.90          | -0.73      |
|                                                                                                 | Low            | 3.03    | 4.51     | 3.97   | 2.12     | 0.49         | 6.75          | 11.71      |
| 2017                                                                                            | High           | 6.02    | 3.44     | 15.57  | 3.99     | 4.19         | 0.39          | NA         |
|                                                                                                 | Medium         | 11.34   | 9.44     | -0.64  | 6.64     | -6.37        | 4.98          | -1.22      |
|                                                                                                 | Low            | 5.09    | 4.97     | 8.76   | 2.55     | 5.98         | 3.62          | 10.01      |
| 2018                                                                                            | High           | 10.91   | 13.83    | -8.00  | 3.98     | 5.64         | 1.22          | NA         |
|                                                                                                 | Medium         | 5.83    | 3.71     | -10.61 | -1.30    | 11.01        | 2.69          | -1.59      |
|                                                                                                 | Low            | 5.01    | 4.01     | 1.76   | -1.20    | -2.26        | 4.32          | 1.07       |
| 2019                                                                                            | High           | 10.21   | 17.37    | -11.40 | 5.07     | -8.81        | 2.39          | NA         |
|                                                                                                 | Medium         | 9.10    | 7.87     | -3.33  | 2.06     | 3.64         | 1.03          | -5.56      |
|                                                                                                 | Low            | 4.27    | 5.60     | 2.66   | -2.27    | 5.65         | -1.02         | 4.23       |
| 2020                                                                                            | High           | 8.97    | 2.20     | 26.49  | -10.11   | -1.51        | 4.05          | NA         |
|                                                                                                 | Medium         | 16.80   | 13.35    | 1.33   | -3.33    | 7.51         | 2.91          | 10.91      |
|                                                                                                 | Low            | 6.10    | 5.75     | -1.35  | 6.97     | 11.39        | 1.14          | 4.51       |
| 2021                                                                                            | High           | 7.42    | -2.72    | -28.14 | 4.38     | -3.49        | 7.84          | NA         |
|                                                                                                 | Medium         | 13.18   | 10.67    | 1.16   | 4.13     | 7.93         | 2.18          | -37.13     |
|                                                                                                 | Low            | 6.71    | 2.35     | 13.50  | 3.62     | 15.07        | 7.43          | 12.23      |

NA = Not Available
